# Supplementary material for: Identification of cellular pathways affected by Sortin2, a synthetic compound that affects protein targeting to the vacuole in Saccharomyces cerevisiae
Source: PubMed Central journal article supplement (PMC2265672; doi:10.1186/1472-6769-8-1), 2008-01-07
Supplement: 1472-6769-8-1-S1.pdf [file 1472-6769-8-1-S1.pdf]

**Supplemental Table 1:** *VPS* genes and hypersensitivity to Sortin2

| <i>vps</i> mutant class | Sortin2 hypersensitive genes                                                                                                 |
|-------------------------|------------------------------------------------------------------------------------------------------------------------------|
| <b>Class A</b> (11)     | VPS8 VPS13 VPS29 VPS38 VPS55 VPS63                                                                                           |
| <b>Class B</b> (17)     | VPS5 VPS17 VAM6/VPS39 VPS41<br>VAM7/VPS43 VPS51 VPS54 VPS61 VPS66<br>VPS71 VPS72                                             |
| <b>Class C</b> (4)      | VPS16                                                                                                                        |
| <b>Class D</b> (9)      | VPS3 VPS9 VPS15 PEP7/VPS19 VPS34 VPS45                                                                                       |
| <b>Class E</b> (16)     | VPS4 VPS20 SNF8/VPS22 STP22/VPS23 VPS24<br>VPS25 VPS27 VPS28 BRO1/VPS31 SNF7/VPS32<br>VPS36 SRN2/VPS37 NHX1/VPS44 DID2/VPS46 |
| <b>Class F</b> (6)      | VPS1 VPS68 VPS71                                                                                                             |

List of *VPS* gene identified as hypersensitive to Sortin2. The number of class members is indicated on parenthesis.
