# Supplementary material for: Identification of cellular pathways affected by Sortin2, a synthetic compound that affects protein targeting to the vacuole in Saccharomyces cerevisiae
Source: Springer Nature journal article supplement (doi:10.1186/1472-6769-8-1), 2008-01-07
Supplement: Additional file 3 [file 1472-6769-8-1-s3.pdf]

**Supplemental Table 3:** TermFinder analysis of gene association with granular GO:component terms.

| GO ID # | GO: component                                | Sortin2 dataset                                                                                                                                                                                 |
|---------|----------------------------------------------|-------------------------------------------------------------------------------------------------------------------------------------------------------------------------------------------------|
| 5794    | Golgi apparatus                              | ARF1 ARL1 ARL3 COG1 COG5 COG6 COG7<br>COG8 ERV41 GEF1 GYP1 IMH1 OCH1 PMR1<br>RIC1 RGP1 RUD3 SEC22 STE13 SYS1 TLG2<br>YPT6 VPS15 VPS45 VPS51 VPS54                                               |
| 17119   | Golgi transport complex                      | COG1 COG5 COG6 COG7 COG8                                                                                                                                                                        |
| 93      | GARP complex                                 | VPS51 VPS54                                                                                                                                                                                     |
| 5768    | endosome                                     | ARN1 BRO1 CCZ1 CDC50 DID2 GEF1 HSE1<br>MRL1 NHX1 PEP7 SNF7 SNF8 SNX41 SRN2<br>STP22 SYN8 TLG2 VPS5 VPS13 VPS17 VPS20<br>VPS24 VPS25 VPS27 VPS28 VPS29 VPS36<br>VPS41 VPS55 VTA1 YGL079W YGR206W |
| 813     | ESCRT I complex                              | VPS37 VPS23 VPS28                                                                                                                                                                               |
| 814     | ESCRT II complex                             | VPS22 VPS25 VPS36                                                                                                                                                                               |
| 815     | ESCRT III complex                            | VPS32 VPS20 VPS24                                                                                                                                                                               |
| 42175   | nuclear envelope-ER network                  | ARL3 CAX4 ERV41 NEM1 PMT1 RCE1 SPF1<br>STE24 VMA21 VMA22 VPH2                                                                                                                                   |
| 16585   | chromatin remodeling complex                 | ARP5 ARP6 BRE2 ISW1 SDC1 SWC3 SWR1<br>VPS71 VPS72 YAF9                                                                                                                                          |
| 812     | SWR1 complex                                 | ARP6 SWC3 SWR1 VPS71 VPS72 YAF9                                                                                                                                                                 |
| 5770    | late endosome                                | CCZ1 CDC50 DID2 MRL1 NHX1 VPS55 VTA1                                                                                                                                                            |
| 5773    | vacuole                                      | ATG18 CCZ1 FAB1 TFP1 TMS1 VAC8 VAC14<br>VAM3 VAM6 VAM7 VAM10 VMA2 VMA5<br>VMA6 VMA8 VMA9 VMA16 VPH1 VPS16<br>VPS41 VPS68 YCK3 YPT7                                                              |
| 16471   | hydrogen-translocating V-type ATPase complex | TFP1 VMA2 VMA5 VMA6 VMA8 VMA9<br>VMA16 VPH1                                                                                                                                                     |
| 43291   | RAVE complex                                 | RAV1 RAV2                                                                                                                                                                                       |
| 30897   | HOPS complex                                 | VAM6 VPS16 VPS41                                                                                                                                                                                |

Analysis of datasets using Term Finder tool.
